# Supplementary material
Source: PubMed Central journal article supplement (PMC1895939)

**A**

| Library ID | Library Description    | 1° screen | 2° screen | 3° screen |
|------------|------------------------|-----------|-----------|-----------|
| 1          | DNase I shuffled (BC9) | 480       | 34        | 10        |
| 2          | Reshuffled BC9 hits    | 600       | 32        | -         |
| 3          | Synthetically shuffled | 588       | 29        | 7         |

**B**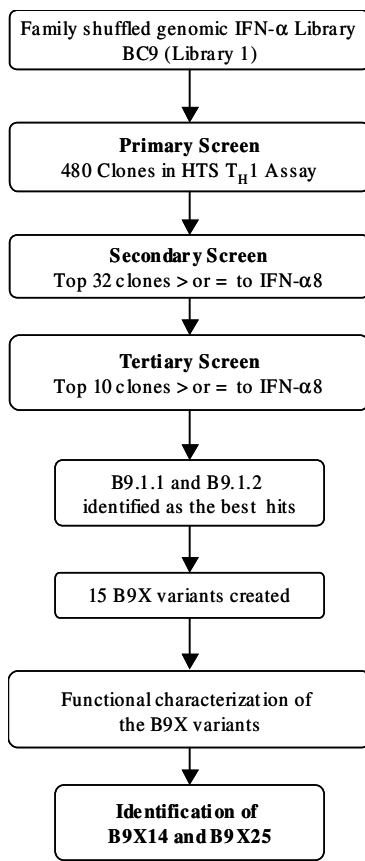

Supplement: pnas_0609001104_1.pdf [file pnas_0609001104_1.pdf]
