# Supplementary material
Source: PubMed Central journal article supplement (PMC1895939)
Supplement: pnas_0609001104_2.pdf [file pnas_0609001104_2.pdf]

# B9.1.1 vs. human IFN-alpha subtypes, and translated reading frame 2 of the IFN-alpha E (LeIF-E) pseudogene

|              | * | 20                                                                                    | * | 40 | * | 60 | * | 80 |  |
|--------------|---|---------------------------------------------------------------------------------------|---|----|---|----|---|----|--|
| B9.1.1       | : | CDLPQTHSLGHRRTMMLLAQMRRISLFSCLKDRHDFRFPQEEFDGNHFQKVQAIFLFYEMMQQTFNLFSTKNSSAAWDETLLEKF | : | 85 |   |    |   |    |  |
| hIFNa-10     | : | .....N..ALI..G..G...P.....I.....Q...A...SVLH..I.....ED.....EQS.....                   | : | 85 |   |    |   |    |  |
| hIFNa-14     | : | .N.S.....NN...L..M.....P.....E.....Q...A...SVLH.....                                  | : | 85 |   |    |   |    |  |
| hIFNa-16     | : | .....N..ALI...G...H.....Y..G...V...Q...A...SA.H..I.....D.....D..                      | : | 85 |   |    |   |    |  |
| hIFNa-17     | : | .....N..ALI...G...P.....GL.....Q...T...SVLH..I.....ED.....EQS.....                    | : | 85 |   |    |   |    |  |
| hIFNa-1      | : | ...E...DN...L.....S...PS...M...G.....Q...AP...SVLH..LI..I...T..D.....D..D..           | : | 85 |   |    |   |    |  |
| hIFNa-21     | : | .....N..ALI...G...P.....G.....Q...A...SVLH..I.....D...T.EQS.....                      | : | 85 |   |    |   |    |  |
| hIFNa-2      | : | .....S...L.....G.....-..Q...AET.PVLH..I..I.....D.....D..                              | : | 84 |   |    |   |    |  |
| hIFNa-4      | : | .....N..ALI...G...H.....G..E...HQ...T...SVLH..I.....ED.....EQS.....                   | : | 85 |   |    |   |    |  |
| hIFNa-5      | : | .....SN...L.IM...G...P.....G.....Q...A...SVLH..I.....D...T.....D..                    | : | 85 |   |    |   |    |  |
| hIFNa-6      | : | .....Q...AE...SVLH.VI.....D...V...R..D.L                                              | : | 85 |   |    |   |    |  |
| hIFNa-7      | : | .....RN..ALI...G...P.....E...E...HQ...T...SVLH..I.....ED.....EQS.....                 | : | 85 |   |    |   |    |  |
| hIFNa-8      | : | .....N..ALI...P.....E.....DKQ...A...SVLH..I.....D...L...DE..                          | : | 85 |   |    |   |    |  |
| hIFNa-E(fr2) | : | -----RTDMTLI.HHGV.H.....H.....D...DT.....D.S                                          | : | 55 |   |    |   |    |  |

|              | * | 100                                                                               | * | 120 | * | 140 | * | 160 |  |
|--------------|---|-----------------------------------------------------------------------------------|---|-----|---|-----|---|-----|--|
| B9.1.1       | : | YIELFQQMNDLEACVMQEVGVEETPLMNVDSILAVRKYFQRITLYLTKKKYSPCSWEVVRAEIMRSFSFSTNLQKRLRRKE | : | 166 |   |     |   |     |  |
| hIFNa-10     | : | ST..Y..L.....I.....E.....IER.....A.....L.....D                                    | : | 166 |   |     |   |     |  |
| hIFNa-14     | : | .....I.....E.....K.....ME...A.....L.....D                                         | : | 166 |   |     |   |     |  |
| hIFNa-16     | : | .....L.....T.....IA...E.....MG...A.....G...D                                      | : | 166 |   |     |   |     |  |
| hIFNa-17     | : | ST..Y..L.N....I...M.....E.....A.....L.....I...D                                   | : | 166 |   |     |   |     |  |
| hIFNa-1      | : | CT..Y..L.....ER.G.....A.....K...R.....E.....A.....L.L...E.....                    | : | 166 |   |     |   |     |  |
| hIFNa-21     | : | ST..N..L.....I.....K.....E.....A.....L.KIF.E.....                                 | : | 166 |   |     |   |     |  |
| hIFNa-2      | : | .T..Y..L.....I.G...T...KE.....KE...A.....L...ES..S..                              | : | 165 |   |     |   |     |  |
| hIFNa-4      | : | ST..Y..L.....I.....E.....A.....L.....D                                            | : | 166 |   |     |   |     |  |
| hIFNa-5      | : | .T..Y..L.....M.....D.....T.....E.....A.....L.A...E.....                           | : | 166 |   |     |   |     |  |
| hIFNa-6      | : | .T..Y..L.....W.GG...E.....E.....A.....S.R...E.....                                | : | 166 |   |     |   |     |  |
| hIFNa-7      | : | ST..Y..L.....I.....E.F.....ME...A.....K.G...D                                     | : | 166 |   |     |   |     |  |
| hIFNa-8      | : | ...D..L...S.....I.S...YE.....E...S.A.....L.I.....KS..                             | : | 166 |   |     |   |     |  |
| hIFNa-E(fr2) | : | .T..Y..L.....-K.....R.....A.....L-----                                            | : | 123 |   |     |   |     |  |
