# Supplementary material
Source: PubMed Central journal article supplement (PMC1895939)
Supplement: pnas_0609001104_3.pdf [file pnas_0609001104_3.pdf]

```

      *      20      *      40      *      60      *      80
B9X1.1 : CDLPQTHSLGHRRTMMLLAQMRRISLFSCLKDRHDFRFPQEEFDGNHFQKVQAIFLFYEMMQQTFNLFSTKNSSAAWDETLLLEKF : 85
B9X12 : .....Q..... : 85
B9X14 : ..... : 85
B9X15 : .....Q...T...SV.H..... : 85
B9X16 : .....Q..... : 85
B9X17 : .....T...SV.H..... : 85
B9X18 : .....Q...T...SV.H..... : 85

```

```

      *      100      *      120      *      140      *      160
B9X1.1 : YIELFQQMNDLEACVMQEVGVEETPLMNVDSILAVRKYFQRITLYLTKKKYSPCSWEVVRAEIMRSFSFSTNLQKRLRRKE : 166
B9X12 : ..... : 166
B9X14 : .....E.....A..... : 166
B9X15 : ..... : 166
B9X16 : .....E.....A..... : 166
B9X17 : .....E.....A..... : 166
B9X18 : .....E.....A..... : 166

```

```

      *      20      *      40      *      60      *      80
B9X1.2 : CDLPQTHSLSNRRTLMLMAQMRRISPFSSCLKDRHDFGFPEEEFDGHQFQKTQAISVLHELIIQQTFNLFSTKNSSAAWDETLLLEKF : 85
B9X22 : .....H..... : 85
B9X23 : .....V...FL.Y..... : 85
B9X24 : ..... : 85
B9X25 : .....H...V...FL.Y..... : 85
B9X26 : .....H..... : 85
B9X27 : .....V...FL.Y..... : 85
B9X28 : .....H...V...FL.Y..... : 85

```

```

      *      100      *      120      *      140      *      160
B9X1.2 : YIELFQQMNNLEACVIQEVGVEEIALMNVDSILAVRKYFRRITLYLTEKKYSPCAWEVVRAEIMRSFSFSTNLQKRLRRKE : 166
B9X22 : ..... : 166
B9X23 : ..... : 166
B9X24 : .....K.....S..... : 166
B9X25 : ..... : 166
B9X26 : .....K.....S..... : 166
B9X27 : .....K.....S..... : 166
B9X28 : .....K.....S..... : 166

```
