# Supplementary material
Source: PubMed Central journal article supplement (PMC1895939)
Supplement: pnas_0609001104_7.pdf [file pnas_0609001104_7.pdf]

**Table 3. Summary of the relative potencies of the shuffled IFN- $\alpha$  and control compounds in the Huh7 EMCV antiviral assay**

| Sample <sup>†</sup> | Mean log EC <sub>50</sub> | SD    | <i>n</i> | Mean EC <sub>50</sub> , ng/ml | Fold over IFN- $\alpha$ 2b <sup>‡</sup> | Fold over IFN-con1 <sup>‡</sup> | <i>P</i> value sample vs IFN-con1 |
|---------------------|---------------------------|-------|----------|-------------------------------|-----------------------------------------|---------------------------------|-----------------------------------|
| B9X16 *             | -1.40                     | 0.302 | 6        | 0.0394                        | 30                                      | 14                              | <0.0001                           |
| B9X14 *             | -1.37                     | 0.338 | 7        | 0.0429                        | 27                                      | 13                              | <0.0001                           |
| B9X28 *             | -1.33                     | 0.399 | 6        | 0.0468                        | 25                                      | 12                              | <0.0001                           |
| B9X25 *             | -1.31                     | 0.142 | 6        | 0.0492                        | 24                                      | 11                              | <0.0001                           |
| B9X23 *             | -1.24                     | 0.210 | 8        | 0.0574                        | 21                                      | 10                              | <0.0001                           |
| B9X18 *             | -1.11                     | 0.323 | 6        | 0.0775                        | 15                                      | 7.1                             | <0.0001                           |
| B9X22 *             | -1.05                     | 0.142 | 4        | 0.0895                        | 13                                      | 6.2                             | <0.0001                           |
| B9.1.1 *            | -1.03                     | 0.196 | 5        | 0.0942                        | 12                                      | 5.9                             | <0.0001                           |
| B9X17 *             | -0.970                    | 0.079 | 6        | 0.107                         | 11                                      | 5.2                             | <0.0001                           |
| B9X27 *             | -0.902                    | 0.231 | 5        | 0.125                         | 9.4                                     | 4.4                             | <0.0001                           |
| B9X12 *             | -0.871                    | 0.245 | 6        | 0.134                         | 8.8                                     | 4.1                             | <0.0001                           |
| B9.1.2 *            | -0.871                    | 0.281 | 6        | 0.135                         | 8.7                                     | 4.1                             | <0.0001                           |
| B9X26 *             | -0.803                    | 0.265 | 3        | 0.158                         | 7.5                                     | 3.5                             | <0.0001                           |
| B9X24 *             | -0.759                    | 0.220 | 5        | 0.174                         | 6.8                                     | 3.2                             | <0.0001                           |
| B9X15 *             | -0.565                    | 0.132 | 4        | 0.272                         | 4.3                                     | 2.0                             | 0.000772                          |
| IFN-con1            | -0.258                    | 0.333 | 7        | 0.553                         | 2.1                                     | 1.0                             | -                                 |
| IFN- $\alpha$ 2b *  | 0.071                     | 0.314 | 8        | 1.18                          | 1.0                                     | 0.47                            | <0.0001                           |

The samples are listed in order of decreasing antiviral potency. The dash indicates not applicable.

<sup>†</sup>The mean log EC<sub>50</sub> values of those interferon samples marked with an asterisk are statistically different at the 95% confidence level from the mean log EC<sub>50</sub> value of IFN-con1 in the Huh7 EMCV assay based on a two-way ANOVA and Fisher's least significant difference post hoc test ( $\alpha = 0.05$ ). The Hill slopes and (SD) are: IFN- $\alpha$ 2b 1.08 (0.18), IFN-con1 1.11 (0.33), B9X14 2.02 (0.62), B9X25 2.46 (0.71).

<sup>‡</sup>Fold improvements were calculated as a ratio of mean EC<sub>50</sub> (ng/ml) values relative to IFN- $\alpha$ 2b or IFN-con1.
