# Supplementary material
Source: PubMed Central journal article supplement (PMC1895939)
Supplement: pnas_0609001104_8.pdf [file pnas_0609001104_8.pdf]

**Table 4. Summary of the relative potencies of the shuffled IFN- $\alpha$  and control compounds in the WISH EMCV antiviral assay**

| Sample <sup>†</sup> | Log mean EC50 | SD    | <i>n</i> | Mean EC <sub>50</sub> , ng/ml | Fold over IFN- $\alpha$ 2b <sup>‡</sup> | Fold over IFN-con1 <sup>‡</sup> | <i>P</i> value sample vs. IFN-con1 |
|---------------------|---------------|-------|----------|-------------------------------|-----------------------------------------|---------------------------------|------------------------------------|
| B9X23 *             | -2.30         | 0.340 | 9        | 0.00504                       | 42                                      | 14                              | 0.00155                            |
| B9X25 *             | -2.06         | 0.307 | 9        | 0.00871                       | 24                                      | 8                               | 0.00578                            |
| B9X1.2 *            | -2.04         | 0.227 | 7        | 0.00911                       | 23                                      | 7.9                             | 0.00682                            |
| B9X16 *             | -2.00         | 0.224 | 8        | 0.00992                       | 21                                      | 7.3                             | 0.00843                            |
| B9X28 *             | -1.98         | 0.179 | 9        | 0.0104                        | 20                                      | 7.0                             | 0.00990                            |
| B9X22 *             | -1.98         | 0.499 | 8        | 0.0104                        | 20                                      | 6.9                             | 0.0121                             |
| B9X27 *             | -1.94         | 0.244 | 8        | 0.0115                        | 18                                      | 6.3                             | 0.0119                             |
| B9X14 *             | -1.91         | 0.240 | 9        | 0.0122                        | 17                                      | 5.9                             | 0.0136                             |
| B9X24 *             | -1.90         | 0.329 | 8        | 0.0125                        | 17                                      | 5.8                             | 0.0147                             |
| B9X26 *             | -1.87         | 0.247 | 7        | 0.0135                        | 16                                      | 5.4                             | 0.0176                             |
| B9X18 *             | -1.76         | 0.240 | 7        | 0.0175                        | 12                                      | 4.1                             | 0.0345                             |
| B9X17 *             | -1.72         | 0.217 | 7        | 0.0191                        | 11                                      | 3.8                             | 0.0431                             |
| B9X1.1              | -1.60         | 0.044 | 7        | 0.0253                        | 8.3                                     | 2.8                             | 0.0882                             |
| B9X15               | -1.39         | 0.110 | 8        | 0.0412                        | 5.1                                     | 1.8                             | 0.313                              |
| B9X12               | -1.23         | 0.232 | 8        | 0.0595                        | 3.5                                     | 1.2                             | 0.727                              |
| IFN-con1            | -1.14         | 0.527 | 6        | 0.0722                        | 2.9                                     | 1.0                             | -                                  |
| IFN- $\alpha$ 2b    | -0.677        | 0.334 | 6        | 0.210                         | 1.0                                     | 0.34                            | 0.103                              |
| IFN- $\alpha$ 2a    | -0.515        | 0.609 | 8        | 0.305                         | 0.69                                    | 0.24                            | 0.0627                             |

The samples are listed in order of decreasing antiviral potency. The dash indicates not applicable.

<sup>†</sup>The mean Log EC<sub>50</sub> values of those interferon samples marked with an asterisk are statistically different from the mean log EC<sub>50</sub> value of IFN-con1 in the WISH EMCV assay based on a two-sample *t* test with unequal variance.

<sup>‡</sup>Fold improvements were calculated as a ratio of mean EC<sub>50</sub> (ng/ml) values relative to IFN- $\alpha$ 2b and IFN-con1.
