# Supplementary material
Source: PubMed Central journal article supplement (PMC1895939)
Supplement: pnas_0609001104_9.pdf [file pnas_0609001104_9.pdf]

**Table 5. Summary of the relative potencies of the B9X.1.2, B9X14, B9X22 and B9X25 compared to the control compounds IFN-con1, IFN- $\alpha$ 2a, and IFN- $\alpha$ 2b in the HeLa EMCV antiviral assay**

| Sample <sup>†</sup> | Mean log EC <sub>50</sub> | SD    | <i>n</i> | Mean EC <sub>50</sub> , ng/ml | Fold over IFN- $\alpha$ 2b <sup>‡</sup> | Fold over IFN-con1 <sup>‡</sup> | <i>P</i> value sample vs. IFN-con1 |
|---------------------|---------------------------|-------|----------|-------------------------------|-----------------------------------------|---------------------------------|------------------------------------|
| B9X25 *             | -2.21                     | 0.338 | 13       | 0.00616                       | 67                                      | 17                              | <0.0001                            |
| B9X14 *             | -2.21                     | 0.230 | 21       | 0.00617                       | 67                                      | 17                              | <0.0001                            |
| B9.1.2 *            | -2.04                     | 0.263 | 16       | 0.00920                       | 45                                      | 11                              | <0.0001                            |
| B9X22 *             | -1.86                     | 0.323 | 4        | 0.0139                        | 30                                      | 7.5                             | <0.0001                            |
| IFN-con1            | -0.981                    | 0.385 | 21       | 0.104                         | 4.0                                     | 1.0                             | <0.0001                            |
| IFN- $\alpha$ 2b *  | -0.385                    | 0.375 | 22       | 0.412                         | 1.0                                     | 0.25                            | <0.0001                            |
| IFN- $\alpha$ 2a *  | -0.326                    | 0.387 | 22       | 0.472                         | 0.87                                    | 0.22                            | <0.0001                            |

The samples are listed in order of decreasing antiviral potency.

<sup>†</sup>The mean Log EC<sub>50</sub> values of those interferon samples marked with an asterisk are statistically different at the 95% confidence level from the mean Log EC<sub>50</sub> value of IFN-con1 in the HeLa EMCV assay based on a two-way ANOVA (sample and experiment) and Fisher's least significant difference post hoc test ( $\alpha = 0.05$ ). The Hill slopes and (SD) are: IFN- $\alpha$ 2b 0.83 (0.18), IFN-con1 0.88 (0.19), B9X14 1.55 (0.34), B9X25 1.49 (0.35).

<sup>‡</sup>Fold improvements were calculated as a ratio of mean EC<sub>50</sub> (ng/ml) values relative to IFN- $\alpha$ 2b and IFN-con1.
