# Supplementary material
Source: PubMed Central journal article supplement (PMC1895939)
Supplement: pnas_0609001104_10.pdf [file pnas_0609001104_10.pdf]

**Table 6. Summary of the relative potencies of the shuffled IFN- $\alpha$  and control compounds in the Th1 differentiation assay**

| Sample <sup>†</sup> | Mean<br>log EC <sub>50</sub> | SD    | <i>n</i> | Mean<br>EC <sub>50</sub> ,<br>ng/ml | Fold over<br>IFN- $\alpha$ 2a <sup>‡</sup> | Fold<br>over<br>IFN-<br>con1 <sup>‡</sup> | <i>P</i> value<br>sample vs.<br>IFN-con1 |
|---------------------|------------------------------|-------|----------|-------------------------------------|--------------------------------------------|-------------------------------------------|------------------------------------------|
| B9X16 *             | -1.70                        | 0.738 | 9        | 0.0199                              | 42                                         | 15                                        | <0.0001                                  |
| B9X23 *             | -1.45                        | 0.483 | 7        | 0.0354                              | 24                                         | 8.6                                       | <0.0001                                  |
| B9X25 *             | -1.40                        | 0.314 | 11       | 0.0395                              | 21                                         | 7.7                                       | <0.0001                                  |
| B9X14 *             | -1.31                        | 0.408 | 12       | 0.0488                              | 17                                         | 6.2                                       | <0.0001                                  |
| B9X28 *             | -1.30                        | 0.522 | 8        | 0.0496                              | 17                                         | 6.1                                       | <0.0001                                  |
| B9X18 *             | -1.16                        | 0.774 | 4        | 0.0696                              | 12                                         | 4.4                                       | 0.00157                                  |
| B9X26 *             | -1.11                        | 0.948 | 3        | 0.0768                              | 11                                         | 3.9                                       | 0.00744                                  |
| B9.1.2 *            | -1.03                        | 0.166 | 2        | 0.0924                              | 9.0                                        | 3.3                                       | 0.0467                                   |
| B9X27 *             | -1.03                        | 0.357 | 3        | 0.0926                              | 9.0                                        | 3.3                                       | 0.0199                                   |
| B9X17 *             | -0.930                       | 0.857 | 4        | 0.118                               | 7.1                                        | 2.6                                       | 0.0372                                   |
| B9X22               | -0.798                       | 0.129 | 3        | 0.159                               | 5.2                                        | 1.9                                       | 0.199                                    |
| IFN-con1            | -0.519                       | 0.525 | 11       | 0.303                               | 2.8                                        | 1.0                                       | -                                        |
| B9X12               | -0.486                       | 0.411 | 3        | 0.326                               | 2.6                                        | 0.93                                      | 0.880                                    |
| B9X15               | -0.332                       | 0.696 | 3        | 0.466                               | 1.8                                        | 0.65                                      | 0.388                                    |
| IFN- $\alpha$ 2a    | -0.079                       | 1.01  | 8        | 0.834                               | 1.0                                        | 0.36                                      | 0.00572                                  |

The samples are listed in order of decreasing potency. The dash indicates not applicable.

<sup>†</sup> The mean log EC<sub>50</sub> values of those interferon samples marked with an asterisk are statistically different at the 95% confidence level from the mean log EC<sub>50</sub> value of IFN-con1 in the Th1 assay based on a two-way ANOVA (sample, donor) and Fisher's least significant difference post hoc test ( $\alpha = 0.05$ ). Note that significant variations from donor to donor are reflected within the standard deviations. The *p* values indicate the confidence that the sample means are different from each other. B9X14 and B9X25 are significantly more potent than both IFN- $\alpha$ 2a and IFN-con1 by the Fisher LSD post-hoc test ( $P < 0.0001$ ). B9X14 ( $n = 12$ ) and B9X25 ( $n = 11$ ) were significantly more potent than both IFN-con1 and IFN- $\alpha$ 2a in all donors.

<sup>‡</sup> Fold improvements were calculated as a ratio of mean EC<sub>50</sub> (ng/ml) values relative to IFN- 2a or IFN-con1.
