# Supplementary material
Source: PubMed Central journal article supplement (PMC1895939)
Supplement: pnas_0609001104_11.pdf [file pnas_0609001104_11.pdf]

**Table 7. Summary of fold change in ratios of antiviral: antiproliferative and Th1: antiproliferative potencies at each variant relative to IFN-con1**

| Variant  | Backbone | M1     | M2     | M3     | AV-Huh | Th1  | AP   | Fold AV:AP | Fold Th1:AP |
|----------|----------|--------|--------|--------|--------|------|------|------------|-------------|
| B9.1.1   | B9.1.1   | ψ      | ψ      | ψ      | 94.2   |      |      |            |             |
| B9X12    | B9.1.1   | B9.1.2 | ψ      | ψ      | 134    | 326  | 69.6 | 68.7       | 15.5        |
| B9X14    | B9.1.1   | ψ      | ψ      | B9.1.2 | 42.9   | 48.8 | 10.5 | 32.4       | 15.6        |
| B9X15    | B9.1.1   | B9.1.2 | B9.1.2 | ψ      | 272    | 466  | 42.4 | 20.6       | 6.6         |
| B9X16    | B9.1.1   | B9.1.2 | ψ      | B9.1.2 | 39.4   | 19.9 | 22.3 | 74.9       | 81.2        |
| B9X17    | B9.1.1   | ψ      | B9.1.2 | B9.1.2 | 107    | 118  | 5.02 | 6.2        | 3.1         |
| B9X18    | B9.1.1   | B9.1.2 | B9.1.2 | B9.1.2 | 77.5   | 69.6 | 9.58 | 16.4       | 10.0        |
| B9.1.2   | B9.1.2   |        | B9.1.2 | B9.1.2 | 135    | 92.4 | 6.15 | 6.0        | 4.8         |
| B9X22    | B9.1.2   | ψ      | B9.1.2 | B9.1.2 | 89.5   | 159  | 8.48 | 12.5       | 3.9         |
| B9X23    | B9.1.2   | B9.1.2 | ψ      | B9.1.2 | 57.4   | 35.4 | 8.32 | 19.2       | 17.0        |
| B9X24    | B9.1.2   | B9.1.2 | B9.1.2 | ψ      | 174    | 0    | 14.9 | 11.3       | 0.0         |
| B9X25    | B9.1.2   | ψ      | ψ      | B9.1.2 | 49.2   | 39.5 | 9.91 | 26.6       | 18.2        |
| B9X26    | B9.1.2   | ψ      | B9.1.2 | B9.1.2 | 158    | 76.8 | 20   | 16.7       | 18.9        |
| B9X27    | B9.1.2   | B9.1.2 | ψ      | ψ      | 125    | 92.6 | 57.3 | 60.6       | 44.9        |
| B9X28    | B9.1.2   | ψ      | ψ      | ψ      | 46.8   | 49.6 | 17.2 | 48.6       | 25.1        |
| IFN-α2b  |          |        |        |        | 1180   | 834  | 4.42 |            |             |
| IFN-con1 |          |        |        |        | 553    | 303  | 4.18 | 1.0        | 1.0         |

The mean potencies of each of the B9X variants, IFN $\alpha$ -2b and IFN-con1, in the Huh antiviral (AV-Huh), Th1-inducing (Th1), and Daudi antiproliferation (AP) assays are given (pg/ml). The fold increase in ratio of AV:AP potency relative to IFN-con1 was calculated for B9X12 by taking the ratio of AV:AP EC50s for IFN-con1 and dividing by the ratio of AV:AP EC50s for B9X12. The fold increases in ratio of AV:AP and Th1:AP potencies relative to IFN-con1 were calculated similarly for the other variants. The parental origin of three sequence motifs corresponding to the pseudogene-derived sequences ( $\Psi$ ) in B9.1.1 are indicated (M1, residue 48; M2, residues 52-60; M3, residues 134 and 142).
