# Supplementary material
Source: PubMed Central journal article supplement (PMC1895939)

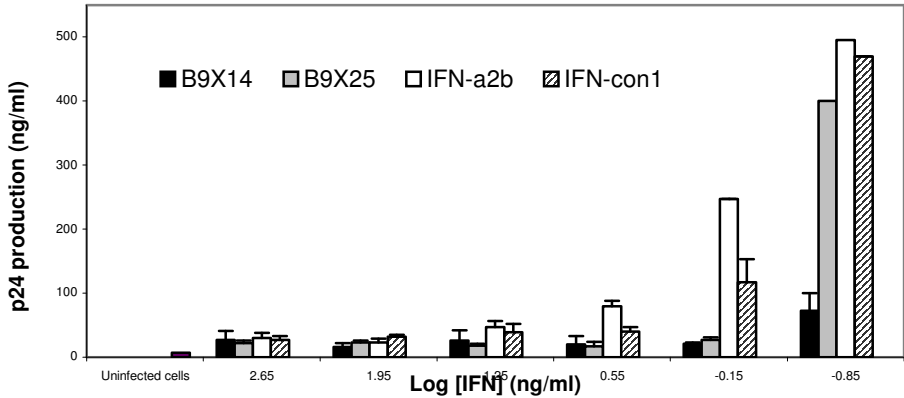

Supplement: pnas_0609001104_4.pdf [file pnas_0609001104_4.pdf]

**A**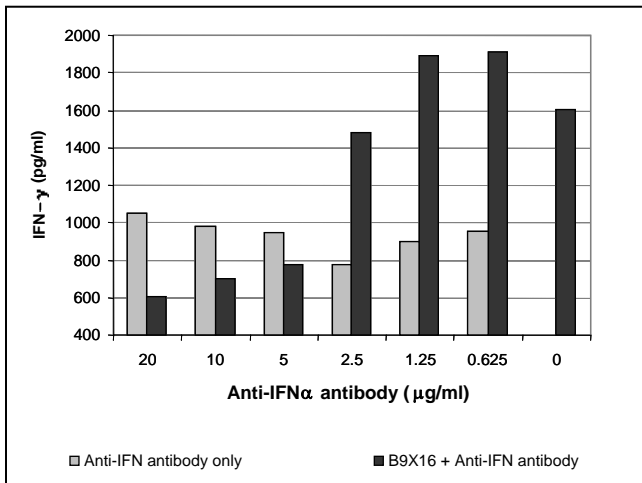**B**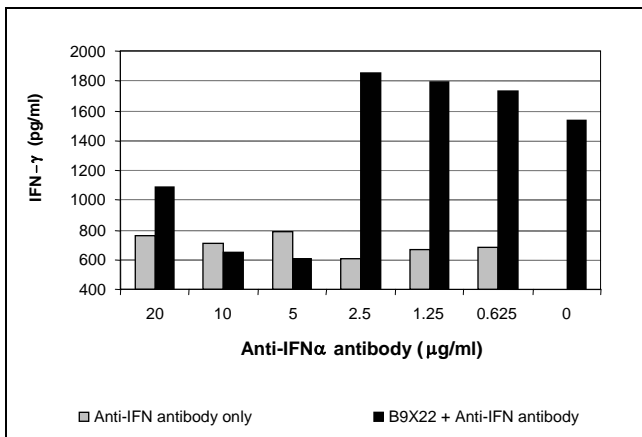

Supplement: pnas_0609001104_5.pdf [file pnas_0609001104_5.pdf]

**A****B9X14 biotinylated on carbohydrates**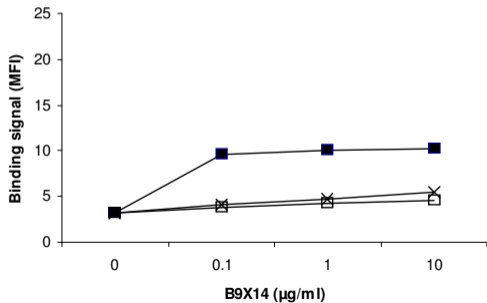**B****B9X14 biotinylated on primary amines**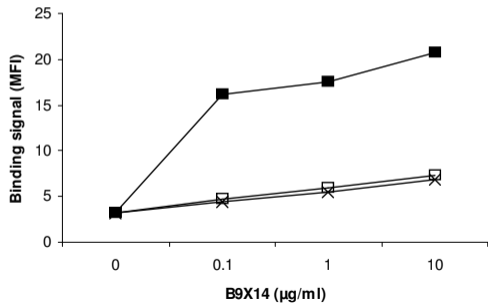

Supplement: pnas_0609001104_6.pdf [file pnas_0609001104_6.pdf]
